# Substantial Impact of Post Vaccination Contacts on Cumulative Infections during Viral Epidemics

Nash D. Rochman<sup>1,\*</sup>, Yuri I. Wolf<sup>1</sup>, and Eugene V. Koonin<sup>1,\*</sup>

<sup>1</sup>National Center for Biotechnology Information, National Library of Medicine, Bethesda, MD 20894

For correspondence: [nash.rochman@nih.gov](mailto:nash.rochman@nih.gov), [koonin@ncbi.nlm.nih.gov](mailto:koonin@ncbi.nlm.nih.gov)

Keywords: SARS-CoV-2, Vaccine Escape, Vaccine Resistance, compartment model

12 **Abstract:**

13

14 **Background:** The start of 2021 will be marked by a global vaccination campaign  
15 against the novel coronavirus SARS-CoV-2. Formulating an optimal distribution strategy  
16 under social and economic constraints is challenging. Optimal distribution is additionally  
17 constrained by the potential emergence of vaccine resistance. Analogous to chronic  
18 low-dose antibiotic exposure, recently inoculated individuals who are not yet immune  
19 play an outsized role in the emergence of resistance. Classical epidemiological  
20 modelling is well suited to explore how the behavior of the inoculated population  
21 impacts the total number of infections over the entirety of an epidemic.

22 **Methods:** A deterministic model of epidemic evolution is analyzed, with 7  
23 compartments defined by their relationship to the emergence of vaccine-resistant  
24 mutants and representing three susceptible populations, three infected populations, and  
25 one recovered population. This minimally computationally intensive design enables  
26 simulation of epidemics across a broad parameter space. The results are used to  
27 identify conditions minimizing the cumulative number of infections.

28 **Results:** When an escape variant is only modestly less infectious than the originating  
29 strain within a naïve population, there exists an optimal rate of vaccine distribution.  
30 Exceeding this rate increases the cumulative number of infections due to vaccine  
31 escape. Analysis of the model also demonstrates that inoculated individuals play a  
32 major role in the mitigation or exacerbation of vaccine-resistant outbreaks. Modulating  
33 the rate of host-host contact for the inoculated population by less than an order of  
34 magnitude can alter the cumulative number of infections by more than 20%.

35 **Conclusions:** Mathematical modeling shows that optimization of the vaccination rate  
36 and limiting post-vaccination contacts can affect the course of an epidemic. Given the  
37 relatively short window between inoculation and the acquisition of immunity, these  
38 results might merit consideration for an immediate, practical public health response.

39

40 **Introduction:**

41  
42 The emergence of the novel Severe Acute Respiratory Syndrome Coronavirus 2  
43 (SARS-CoV-2) responsible for the Covid-19 pandemic motivated dramatic public health  
44 intervention including recommendations for isolation and quarantine throughout most of  
45 2020<sup>1</sup>. The beginning of 2021 will be marked by widespread vaccine distribution.  
46 Optimizing distribution is challenging and subject to a myriad of social and economic  
47 constraints<sup>2-4</sup>. The potential emergence of vaccine-resistant variants of the virus<sup>5,6</sup>  
48 introduces additional complications. Vaccination applies new selective pressures which  
49 can lead to diverse intermediate outcomes even under conditions admitting eventual  
50 pathogen eradication<sup>7-13</sup>. The larger the size of the vaccinated population, the greater  
51 the pressure towards escape of vaccine-resistant variants.

52  
53 Escape variants emerge within individual hosts after infection with the originating strain.  
54 Naïve, unvaccinated, hosts are more easily infected than vaccinated hosts but  
55 mutations conferring resistance are unlikely to provide a selective advantage in the  
56 naïve background. Thus, naïve hosts are likely to shed escape variants at very low,  
57 likely, negligible rates. The reverse is true for vaccinated hosts. Recently vaccinated,  
58 inoculated, hosts that are not yet immune remain highly susceptible to infection with the  
59 originating strain, and in these hosts, mutations conferring resistance are more likely to  
60 provide a selective advantage. As a result, a substantial fraction or even most of the  
61 virus shed by such hosts will be resistant mutants. This situation is analogous to the  
62 administration of a low-dose antibiotic regime<sup>14,15</sup>. In both cases, the pathogen is  
63 introduced to a susceptible host and subject to elevated selective pressure towards the  
64 emergence of resistant (escape) variants.

65  
66 We sought to establish the constraints imposed by virus escape on optimal vaccine  
67 distribution and the role played by the small, but critical, population of inoculated hosts.  
68 To this end, we constructed an epidemiological compartment model to simulate  
69 vaccination campaigns over a broad parameter regime. This minimally computationally

70 intensive approach enabled us to simulate many possible scenarios for epidemic  
71 evolution, in order to determine the optimal vaccination strategy for each condition.

72

### 73 **Methods:**

74

75 We divided the population into 7 compartments (Fig. 1A). Three compartments are  
76 susceptible to infection by either the originating strain or escape mutants: Naïve ( $N$ ,  
77 unvaccinated and fully susceptible to the originating strain and escape mutants),  
78 Inoculated ( $I$ , recently vaccinated and still partially susceptible to the originating strain,  
79 and fully susceptible to escape mutants), and Vaccinated ( $V$ , minimally susceptible to  
80 the originating strain, but fully susceptible to escape mutants). Two compartments  
81 represent ongoing infection with the originating strain and are distinguished by the  
82 host's previous compartment: Infected-Naïve ( $F$ ) and Infected-Inoculated ( $M$ ). The third  
83 infected compartment represents infection by an escape variant, Infected-Escape ( $E$ ).  
84 The remaining compartment, Recovered ( $R$ ), contains all hosts who were previously  
85 infected. Vaccination is represented by a reduction in susceptibility to infection with the  
86 originating strain. Naïve hosts are inoculated at rate  $k_v$ . Inoculated hosts do not  
87 immediately acquire immunity and mature into the vaccinated compartment at rate  $k_m$ .  
88 All infected hosts recover at rate  $k_r$ .

89

90 Within the timescale of the model, recovery is assumed to grant stable immunity, and  
91 any variation in population size due to birth/death is assumed to be negligible. It should  
92 be noted that, if recovery from the Infected-Naïve or Infected-Inoculated compartments  
93 does not confer immunity against escape infection, the key results in this work will have  
94 an even greater impact on the vaccination outcome. Hosts come into contact at rate  $k_c$ .  
95 For simplicity, we assume that contact with an escape-infected host can only produce  
96 an escape infection. Also, vaccine efficacy is assumed to be perfect such that  
97 vaccinated hosts cannot be infected with the originating strain. The Inoculated-Infected  
98 compartment is assumed to represent a symmetric composition of escape and  
99 originating infections such that the total probability of a Naïve or Inoculated host being  
100 infected after contact with a Naïve-Infected or Inoculated-Infected host is the same.

101 Finally, we assume that the probability of escape-infection is the same for Naïve and  
102 Vaccinated hosts across all three types of infected-susceptible host interactions. This  
103 construction yields the following transition probability matrices for Naïve, Inoculated,  
104 and Vaccinated hosts:

$$105 \quad k_C P_N = k_I \begin{bmatrix} 1 & 0 & \alpha \\ 1 - \beta & 0 & \alpha + \beta \\ 0 & 0 & \beta \end{bmatrix}; k_C P_I = k_I \begin{bmatrix} 0 & 1 + \alpha & 0 \\ 0 & 1 + \alpha & 0 \\ 0 & 0 & \beta \end{bmatrix}; k_C P_V = k_I \begin{bmatrix} 0 & 0 & \alpha \\ 0 & 0 & \alpha + \beta \\ 0 & 0 & \beta \end{bmatrix}$$

106 where  $k_I$  represents the rate of infection for Naïve, Infected-Naïve host interactions  
107 which is determined both by the contact rate  $k_C$  and the infectivity of the originating  
108 strain. Rows represent interaction with each of the infected compartments (Infected-  
109 Naïve, Infected-Inoculated, and Infected-Escape). Columns represent transitions to  
110 each of the infected compartments.

111  
112 An escape mutant can emerge within an Infected-Naïve or Infected-Inoculated host.  
113 The parameter  $\alpha$  represents the infectivity of the escape variant relative to the  
114 originating strain when a Naïve host interacts with an Infected-Naïve host. The  
115 parameter  $\beta$  represents the infectivity of an escape variant when a Naïve host interacts  
116 with an Infected-Escape host relative to the infectivity of the originating strain when a  
117 Naïve host interacts with an Infected-Naïve host. Informally,  $\alpha$  reflects the ratio of  
118 escape variant to originating strain shed by Infected-Naïve hosts, whereas  $\beta$  reflects the  
119 fitness of an escape variant relative to the originating strain. Finally, we introduce the  
120 parameter  $q$  to represent the impact of varying the rate of host-host contact for  
121 Inoculated hosts relative to that for the other compartments.  $q > 1$  represents increased  
122 contact, and  $q < 1$  corresponds to decreased contact. This completes the model  
123 description and structures the differential equations:

$$N' = -(k_V + k_I ((1 + \alpha) (F + M) + \beta E)) N$$

$$I' = k_V N - (k_M + qk_I ((1 + \alpha) (F + M) + \beta E)) I$$

$$V' = k_M I - k_I (\alpha F + (\alpha + \beta) M + \beta E) V$$

$$F' = k_I (NF + (1 - \beta) NM) - k_R F$$

$$M' = qk_I (1 + \alpha) (F + M) I - k_R M$$

$$E' = k_I ((\alpha F + (\alpha + \beta) M + \beta E) (N + V) + q\beta EI) - k_R E$$

$$R' = k_R (F + M + E)$$

124

125  $k_R = k_M = 1/7$  are fixed across all simulations representing a time to recovery and time  
126 between inoculation and the acquisition of immunity of one week. Reducing  $k_I$  would  
127 prolong the epidemic and reducing  $k_M$  would increase the size of the Inoculated  
128 compartment.

129

130  $k_I$  is the principal determinant of epidemic magnitude and duration, with larger  $k_I$  leading  
131 to a greater cumulative number of infections over a shorter period of time (Fig. 1B).  
132 However, feedback between the size of the infected population and the rate of host-host  
133 contact as well as spatial structure can decouple these variables. Throughout this work,  
134  $k_I$  is set to a benchmark value of 0.2 resulting in 50% of the population being infected  
135 over a period of approximately 4 months.

136

137 The values of  $\alpha$  and  $\beta$  impact the size of the Infected-Escape compartment. Even in the  
138 absence of vaccination, large  $\alpha/\beta$  results in the emergence of would-be resistant  
139 variants (Fig 1C). In all analyses in this work,  $\alpha$  is fixed at the benchmark value of 0.001  
140 resulting in a modest number of would-be resistant infections for  $\beta$  close to 1 in the  
141 absence of vaccination. Although a larger  $\alpha$  would result in a greater total number of

142 escape infections, the fraction of those infections attributable to contact with inoculated  
143 hosts would be smaller.

144  
145 The solutions of the ODEs were obtained using the MATLAB ode45 method<sup>16</sup>.  
146 Epidemics are simulated until the size of the Recovery compartment at arbitrarily long  
147 times is approached. The principal quantity of interest is the cumulative number of  
148 infections. When  $k_v$  is selected to minimize this value, minima are found through explicit  
149 simulation over a range of rates. In the subsequent analysis, some values are  
150 expressed relative to the cumulative number of infections in the absence of vaccination,  
151  $R_{Null} \sim 50\%$ .

152  
153 **Results:**

154  
155 In addition to the rate of vaccination, the outcome of a vaccination campaign depends  
156 on how far the epidemic has progressed before vaccination begins, which can be  
157 measured by the relative size of the Recovered compartment. The results also depend  
158 on  $\beta$ , informally, the fitness of an escape variant relative to the originating strain. We  
159 considered two values for  $\beta$  (0.01, low; 0.875, high) and varied both the start and rate of  
160 vaccination. When  $\beta$  is low, that is, the escape mutant is much less fit than the  
161 originating strain (Fig. 2A), vaccinating earlier and distributing the vaccine faster  
162 decreases the cumulative number of infections. If distribution is sufficiently prompt, the  
163 cumulative number of infections becomes negligible.

164  
165 However, the outcome substantially differs for high  $\beta$  (Fig. 2B). Due to the vaccine  
166 escape, at high rates of distribution, the cumulative number of infections remains large.  
167 Furthermore, there is an optimal rate of distribution such that exceeding this rate  
168 increases the cumulative number of infections. In this regime, the benefit of reducing the  
169 size of the population susceptible to infection by the originating strain is outweighed by  
170 the cost of increasing the selective pressure for the emergence of escape variants. In all  
171 subsequent analysis, the vaccination rate is varied but vaccination is fixed to begin  
172 when 1% of the population has recovered from infection.

173  
174 Infections can be mitigated by reducing host-host contact. We sought to determine how  
175 perturbing the contact rates for hosts in the Inoculated compartment relative to that of all  
176 other compartments,  $q$ , affects the outcome. For  $\beta$  ranging between 0.75 and 1, we  
177 considered three relative contact rates,  $q=[0.2, 1, 5]$  (Fig. 2C). Increasing the rate of host-  
178 host contact only within this compartment has a significant impact on the cumulative  
179 number of infections. The optimal vaccination rate is also perturbed. Furthermore, if the  
180 optimal vaccination rate it exceeded, reducing  $q$  below 1 slows the accumulation of  
181 infections (Fig. 2D). The converse is true for increasing  $q$ , and the landscape is similar  
182 when vaccination falls below the optimal rate (Fig. 2E).

183  
184 Having demonstrated how  $q$  perturbs the optimal vaccination rate and how reducing  $q$   
185 below 1 can mitigate or delay the cumulative number of infections even if this rate is not  
186 met or, conversely, is exceeded, we sought to establish the impact of  $q$  on the  
187 cumulative number of infections across a wide range of  $\beta$  at the optimal vaccination rate  
188 for each condition (Fig. 3A). The cumulative number of infections is sensitive to  $q$  across  
189 the entire range of  $\beta$ . Varying  $q$  within an order of magnitude can substantially aid or  
190 hinder the vaccination campaign, and when  $q \gg 1$ , the optimal rate of vaccination is 0.  
191 Note that the maximum vaccination rate considered is  $k_v=0.03$  representing the  
192 inoculation of 3% of Naïve hosts per day. This rate is sufficiently high that the  
193 cumulative number of infections at this rate (Fig. 3B) is similar or higher compared to  
194 the hypothetical case where the entire Naïve population is immediately inoculated (Fig.  
195 3C). Some of these effects are not specific to the inoculated compartment. Increasing  
196 the rate of contact for any arbitrary subpopulation can increase the cumulative number  
197 of infections. We define the effective  $k_I$ ,  $k_{Ieff}$ , such that the cumulative number of  
198 infections for  $k_I=k_{Ieff}$  and  $q=1$  is equal to the cumulative number of infections for  $k_I=0.2$   
199 (the benchmark) and arbitrary  $q$ . Increasing  $q$  within an order of magnitude is equivalent  
200 to substantially increasing  $k_I$  for the entire population for the entirety of the epidemic  
201 (Fig. 3D).

202



203 We additionally consider the cumulative infections added or subtracted relative to the  
204 outcome corresponding to  $q=1$  and scaled by the fraction of infections due to vaccine  
205 escape (Fig. 3E). Varying  $q$  within an order of magnitude alters the cumulative number  
206 of infections added or subtracted by more than 20% of the cumulative number of  
207 infections in the absence of vaccination,  $R_{Null}$ , again demonstrating the critical role  
208 played by inoculated hosts with respect to vaccine escape. The landscape is similar  
209 when then rate of vaccination is fixed (Fig. 3F).

210

## 211 **Discussion:**

212

213 Epidemics can be mitigated through the reduction of host-host contact (quarantines and  
214 other similar measures) and vaccination. A reduction in contact carries non-negligible  
215 social and economic burdens so that, when vaccination becomes possible, the  
216 continuation of such interventions might appear unnecessarily costly. Formulating an  
217 optimal vaccination strategy to balance these pressures is challenging and is further  
218 complicated by the possibility of vaccine escape. Escape variants emerging as a result  
219 of vaccination are not expected to be more infectious than the originating strain,  
220 otherwise, such variants would likely already be in circulation prior to vaccination.  
221 However, newly emergent variants are not always much less infectious and can be  
222 responsible for non-negligible disease incidence<sup>17,18</sup>. Here, we demonstrated that, even  
223 when escape variants are modestly less infectious, there exists an optimal vaccination  
224 distribution rate such that exceeding this rate increases the cumulative number of  
225 infections. This optimal rate depends on the infectivity of the escape variants. Such a  
226 prediction is impractical at the time of writing, that is, in the very first days of the  
227 vaccination campaign, and the cost of overestimation of the optimal vaccination rate is  
228 far less than that of underestimation. However, to our knowledge, this phenomenon,  
229 analogous to the evolution of antibiotic resistance, is not widely appreciated and, as  
230 such, seems to warrant discussion.

231

232 Of more practical concern is the role of inoculated hosts in the emergence of escape  
233 variants. Within low-dose antibiotic regimes<sup>14,15</sup>, hosts are susceptible to infection with

234 the originating variant, and in such hosts, the pathogen is subjected to elevated  
235 selective pressures towards the emergence of resistance. Similarly, within inoculated  
236 hosts, the virus is subjected to gradually increasing selective pressures towards the  
237 emergence of resistance while the intra-host population remains sufficiently large to  
238 explore a substantial fraction of the mutation space. We demonstrated that moderately  
239 increasing or decreasing the host-host contact rates for inoculated hosts only can  
240 substantially aid or hinder the vaccination campaign. The time between vaccination and  
241 the acquisition of immunity can be readily approximated from clinical endpoints<sup>19,20</sup> and  
242 is likely to be short enough that the societal costs of limiting post-vaccination contact  
243 would be outweighed by these benefits.

244

#### 245 **Limitations:**

246

247 In this study, we leveraged classical modelling techniques to elucidate the factors that  
248 could substantially impact the outcome of any vaccination campaign. Although these  
249 results are broadly applicable, they are not necessarily instrumental for predicting  
250 quantitative outcomes for the current SARS-CoV-2 pandemic or any other particular  
251 epidemic. Similarly, the model presented in this study is not designed to forecast long-  
252 term outcome, a topic that has been thoroughly addressed for the case of SARS-Cov-2  
253 and more generally<sup>7-13,21-23</sup>.

254

255 The results presented here appear to be of immediate interest in relation to the  
256 vaccination campaign against SARS-Cov-2 that is beginning at the time of this writing.  
257 However, although diversification of the virus is apparent<sup>24-26</sup> and the potential for  
258 escape is being actively investigated<sup>5,6,27,28</sup>, it cannot be ruled out that all escape  
259 variants have a substantially reduced infectivity, represented by  $\beta \ll 1$ , in which case the  
260 highest possible vaccination rate will be optimal and the benefits specific to post-  
261 vaccination contact limitation could be negligible.

262

#### 263 **Conclusions:**

264

265 Depending on the infectivity of escaping, vaccine-resistant mutants, the optimal  
266 vaccination rate with respect to the cumulative number of infections can be lower than  
267 the maximum rate. Contact rates for inoculated hosts can have a substantial impact on  
268 the outcomes of vaccination campaigns. Even a brief and moderate limitation of  
269 contacts in this well-defined population can potentially mitigate epidemics. These results  
270 might merit consideration for an immediate, practical public health response.

271

#### 272 **Author Contributions:**

273

274 NDR, YIW, and EVK conceived of the study; NDR constructed the model; NDR, YIW,  
275 and EVK analyzed data; NDR and EVK wrote the manuscript that was edited and  
276 approved by all authors.

277

#### 278 **Acknowledgements:**

279

280 The authors thank Koonin group members for helpful discussions. NDR, YIW, and EVK  
281 are supported by the Intramural Research Program of the National Institutes of Health  
282 (National Library of Medicine).

283

284 **References:**

285

- 286 1. CDC. Public Health Guidance for Potential COVID-19 Exposure Associated with Travel. 2020.
- 287 2. Neumann-Böhme S, Varghese NE, Sabat I, et al. Once we have it, will we use it? A European survey on
- 288 willingness to be vaccinated against COVID-19. *The European Journal of Health Economics*: Springer; 2020.
- 289 3. Quinn SC, Kumar S, Freimuth VS, Kidwell K, Musa D. Public willingness to take a vaccine or drug under
- 290 Emergency Use Authorization during the 2009 H1N1 pandemic. *Biosecurity and Biodefense Strategy, Practice, and Science* 2009; **7**(3): 275-90.
- 291
- 292 4. Mills MC, Salisbury D. The challenges of distributing COVID-19 vaccinations. *EClinicalMedicine* 2020.
- 293 5. Li Q, Wu J, Nie J, et al. The impact of mutations in SARS-CoV-2 spike on viral infectivity and antigenicity.
- 294 *Cell* 2020; **182**(5): 1284-94. e9.
- 295 6. Kennedy DA, Read AF. Monitor for COVID-19 vaccine resistance evolution during clinical trials. *PLoS*
- 296 *Biology* 2020; **18**(11): e3001000.
- 297 7. Magpantay F, King A, Rohani P. Age-structure and transient dynamics in epidemiological systems. *Journal*
- 298 *of the Royal Society Interface* 2019; **16**(156): 20190151.
- 299 8. Restif O, Grenfell BT. Integrating life history and cross-immunity into the evolutionary dynamics of
- 300 pathogens. *Proceedings of the Royal Society B: Biological Sciences* 2006; **273**(1585): 409-16.
- 301 9. Rodrigues HS, Monteiro MTT, Torres DF. Vaccination models and optimal control strategies to dengue.
- 302 *Mathematical biosciences* 2014; **247**: 1-12.
- 303 10. Safan M, Kretzschmar M, Hadelier KP. Vaccination based control of infections in SIRS models with
- 304 reinfection: special reference to pertussis. *Journal of mathematical biology* 2013; **67**(5): 1083-110.
- 305 11. Scherer A, McLean A. Mathematical models of vaccination. *British Medical Bulletin* 2002; **62**(1): 187-99.
- 306 12. van Boven M, Mooi FR, Schellekens JF, de Melker HE, Kretzschmar M. Pathogen adaptation under
- 307 imperfect vaccination: implications for pertussis. *Proceedings of the Royal Society B: Biological Sciences* 2005;
- 308 **272**(1572): 1617-24.
- 309 13. Gandon S, Day T. The evolutionary epidemiology of vaccination. *Journal of the Royal Society Interface*
- 310 2007; **4**(16): 803-17.
- 311 14. Livermore DM. Minimising antibiotic resistance. *The Lancet infectious diseases* 2005; **5**(7): 450-9.
- 312 15. Roberts JA, Kruger P, Paterson DL, Lipman J. Antibiotic resistance—what’s dosing got to do with it? *Critical*
- 313 *care medicine* 2008; **36**(8): 2433-40.
- 314 16. Shampine LF, Reichelt MW. The matlab ode suite. *SIAM journal on scientific computing* 1997; **18**(1): 1-22.
- 315 17. Carman WF, Karayiannis P, Waters J, et al. Vaccine-induced escape mutant of hepatitis B virus. *The Lancet*
- 316 1990; **336**(8711): 325-9.
- 317 18. Brueggemann AB, Pai R, Crook DW, Beall B. Vaccine escape recombinants emerge after pneumococcal
- 318 vaccination in the United States. *PLoS Pathog* 2007; **3**(11): e168.
- 319 19. Polack FP, Thomas SJ, Kitchin N, et al. Safety and efficacy of the BNT162b2 mRNA covid-19 vaccine. *New*
- 320 *England Journal of Medicine* 2020.
- 321 20. Zhang Y, Zeng G, Pan H, et al. Safety, tolerability, and immunogenicity of an inactivated SARS-CoV-2
- 322 vaccine in healthy adults aged 18–59 years: a randomised, double-blind, placebo-controlled, phase 1/2 clinical
- 323 trial. *The Lancet Infectious Diseases* 2020.
- 324 21. Saad-Roy CM, Wagner CE, Baker RE, et al. Immune life history, vaccination, and the dynamics of SARS-
- 325 CoV-2 over the next 5 years. *Science* 2020; **370**(6518): 811-8.
- 326 22. Day T, Gandon S, Lion S, Otto SP. On the evolutionary epidemiology of SARS-CoV-2. *Current Biology* 2020.
- 327 23. Rochman ND, Wolf YI, Koonin EV. Evolution of Human Respiratory Virus Epidemics. *medRxiv* 2020:
- 328 2020.11.23.20237503.
- 329 24. Kumar S, Tao Q, Weaver S, et al. An evolutionary portrait of the progenitor SARS-CoV-2 and its dominant
- 330 offshoots in COVID-19 pandemic. *bioRxiv* 2020.
- 331 25. Rochman ND, Wolf YI, Faure G, Zhang F, Koonin EV. Ongoing Global and Regional Adaptive Evolution of
- 332 SARS-CoV-2. *bioRxiv* 2020.
- 333 26. van Dorp L, Acman M, Richard D, et al. Emergence of genomic diversity and recurrent mutations in SARS-
- 334 CoV-2. *Infection, Genetics, Evolution* 2020: 104351.

- 335 27. Garrett ME, Galloway J, Chu HY, et al. High resolution profiling of pathways of escape for SARS-CoV-2  
336 spike-binding antibodies. *bioRxiv* 2020.
- 337 28. Starr TN, Greaney AJ, Hilton SK, et al. Deep mutational scanning of SARS-CoV-2 receptor binding domain  
338 reveals constraints on folding and ACE2 binding. *Cell* 2020; **182**(5): 1295-310. e20.
- 339
- 340

341

## 342 **Figure legends**

343

344 **Figure 1. The Model. A.** Schematic of the 7 compartment model with three susceptible,  
345 three infected, and one recovered compartments. **B.** Simulated epidemics for  
346  $k_I=[0.15,0.175,0.2(\text{solid line}),0.225,0.25]$ ,  $\alpha=0.001$ ,  $\beta=0.01$  **C.** The ratio of cumulative  
347 escape infections to all cumulative infections for an epidemic over a range of  $\alpha$ .  
348  $\beta=[0.5,0.67,0.83,1]$ , darker color indicates higher value,  $k_I=0.2$ . The dotted line specifies  
349 the benchmark value of  $\alpha=0.001$ .

350

351 **Figure 2. Optimal Vaccine Distribution. A.** The cumulative number of infections  
352 relative to no vaccination,  $R_{Null}$ , for a range of vaccine initiations and distribution rates.  
353 Here  $\beta$  is low, 0.01. **B.** The cumulative number of infections relative to no vaccination,  
354  $R_{Null}$ , for a range of vaccine initiations and distribution rates and a large  $\beta$  (0.875). **A/B.**  
355 3840 values were computed for each panel and 4x by 4x bilinearly interpolated points  
356 are displayed. **C.** The cumulative number of infections relative to no vaccination,  $R_{Null}$ ,  
357 for  $\beta=[0.75(\text{dotted}),0.875(\text{dashed}),1(\text{solid})]$  and three relative contact rates,  
358  $q=[0.2(\text{brown}),1(\text{black}),5(\text{gray})]$ . **D.** Simulated epidemics comparing a high fixed rate of  
359 vaccination,  $k_V=0.03$  (solid) representing the inoculation of 3% of Naïve hosts per day,  
360 and the optimal vaccination rate for each condition (dashed).  $\beta=0.875$  is fixed and  
361  $q=[0.2(\text{brown}),1(\text{black}),5(\text{gray})]$ . **E.** Same as D. with a low fixed rate of vaccination,  
362  $k_V=0.01$ . **C/D/E.** The minima for the dashed lines in C correspond to the dashed lines in  
363 D/E.

364

365 **Figure 3. Post-vaccination contacts. A.** The cumulative number of infections relative  
366 to no vaccination,  $R_{Null}$ , for a range of  $\beta$  and  $q$ , optimizing  $k_V$  for each condition. **B.** Same  
367 as in A. for fixed  $k_V=0.03$  representing the inoculation of 3% of Naïve hosts per day. **C.**  
368 Same as in A. for the case where all Naïve hosts are immediately inoculated. **D.** Log of  
369 the effective  $k_I$ ,  $k_I^{eff}$ , relative to  $k_I=0.2$ , the benchmark, vs. log of  $q$  for  $\beta=[0.5$  (dotted  
370 line), 0.7 (dashed line), 1 (solid line)]. **E.** The cumulative number of infections relative to  
371  $R_{Null}$  and  $q=1$  scaled by the fraction of infections due to vaccine escape,

372  $\sum \text{Escape}(q) / \sum \text{Infections}(q) (\sum \text{Infections}(q) - \sum \text{Infections}(q=1)) / R_{\text{Null}}$ , for a range of  $\beta$  and  $q$ ,  
373 optimizing  $k_v$  for each condition. **F.** Same as in E for fixed  $k_v=0.03$ . **A-C/E/F.** 961 values  
374 were computed for each panel and 4x by 4x bilinearly interpolated points are displayed.  
375

**A**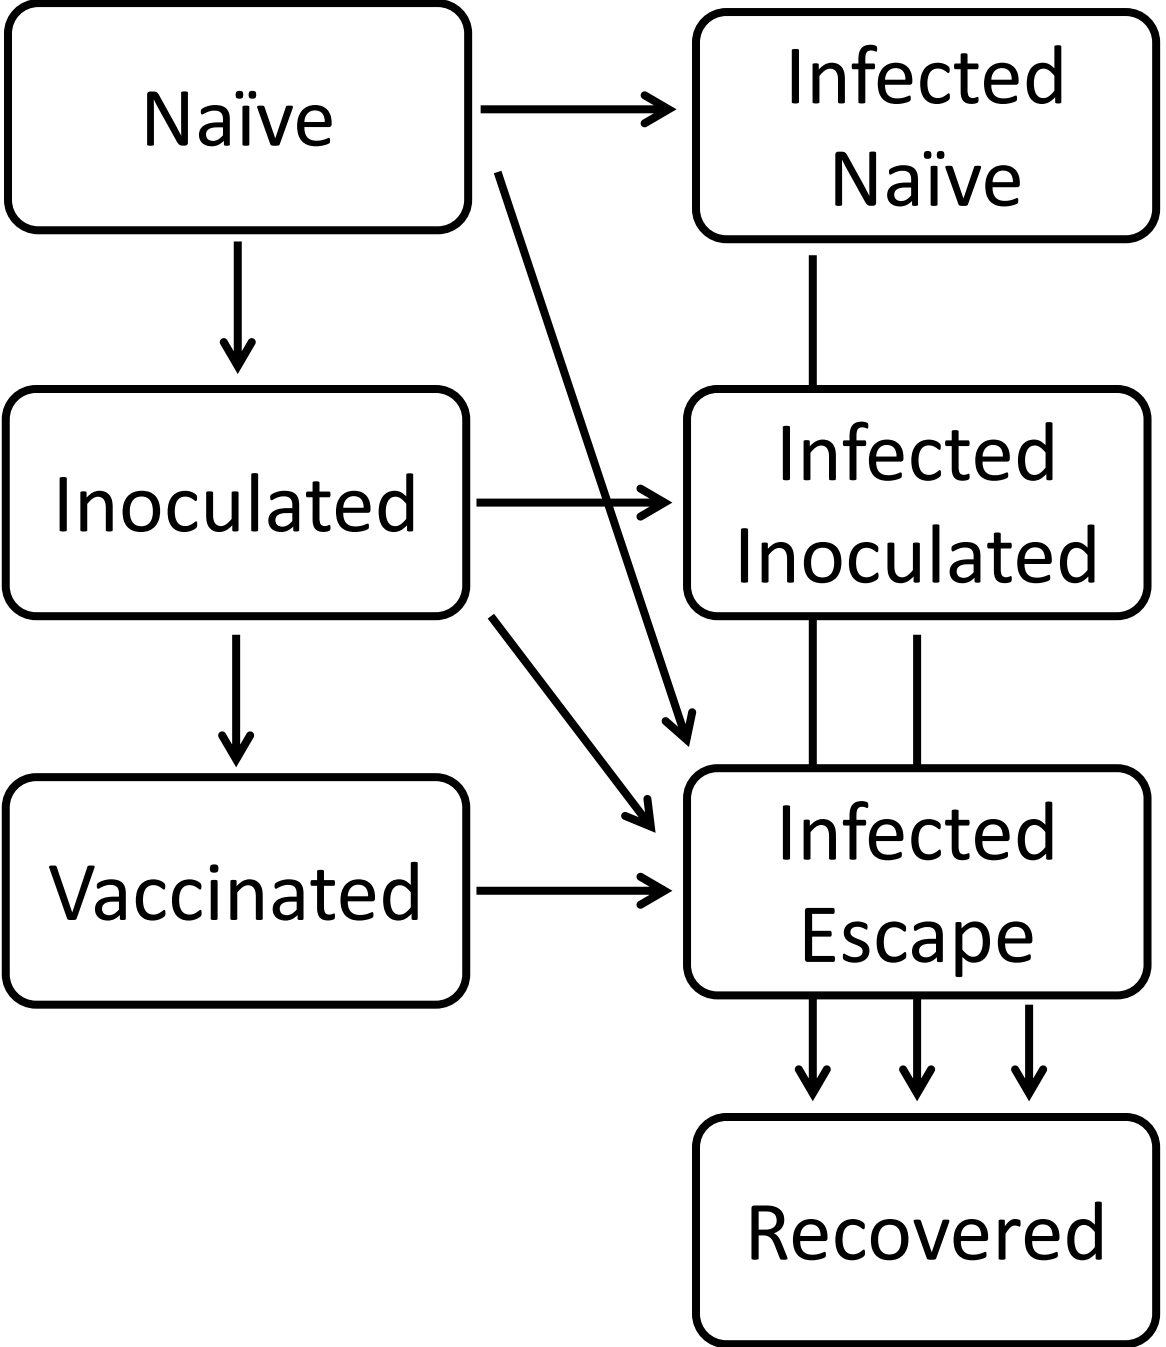**B**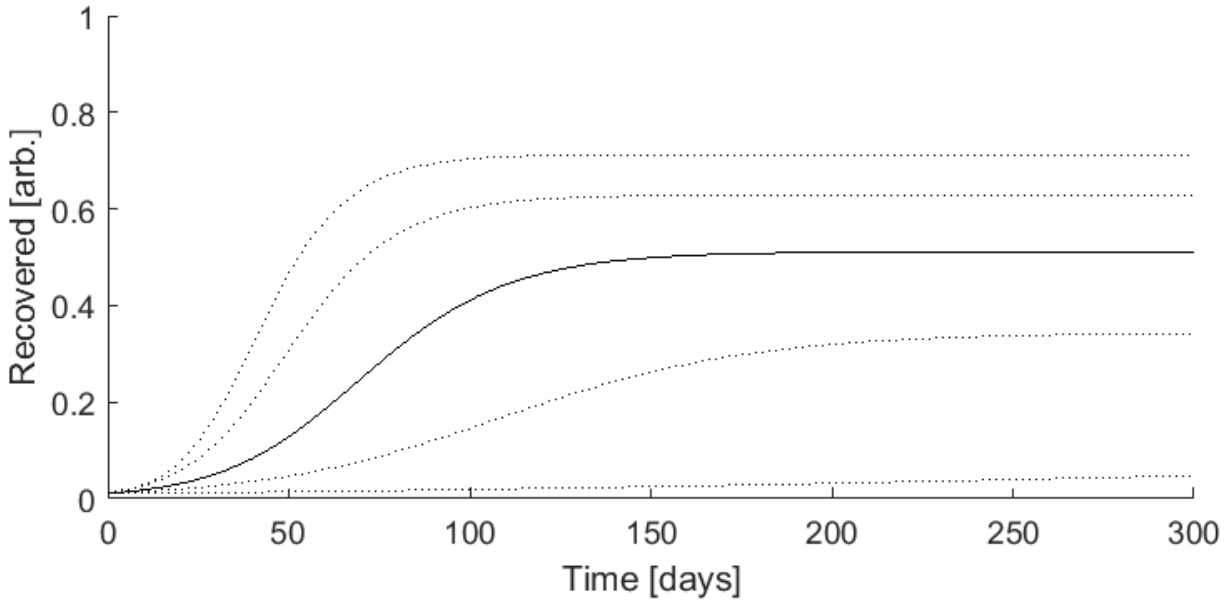**C**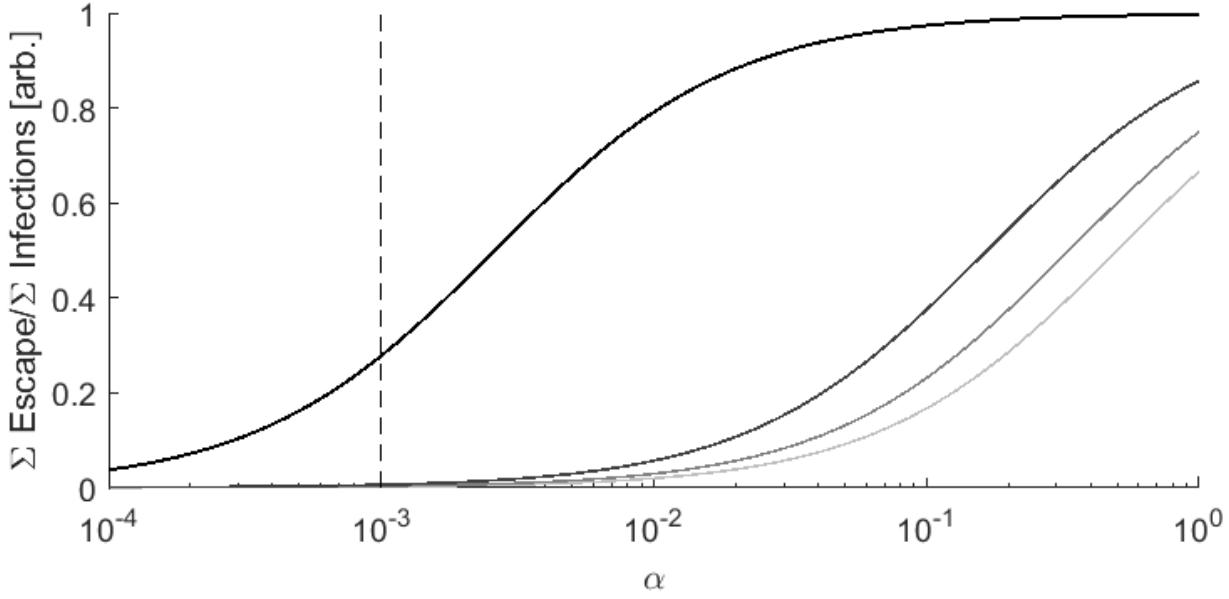



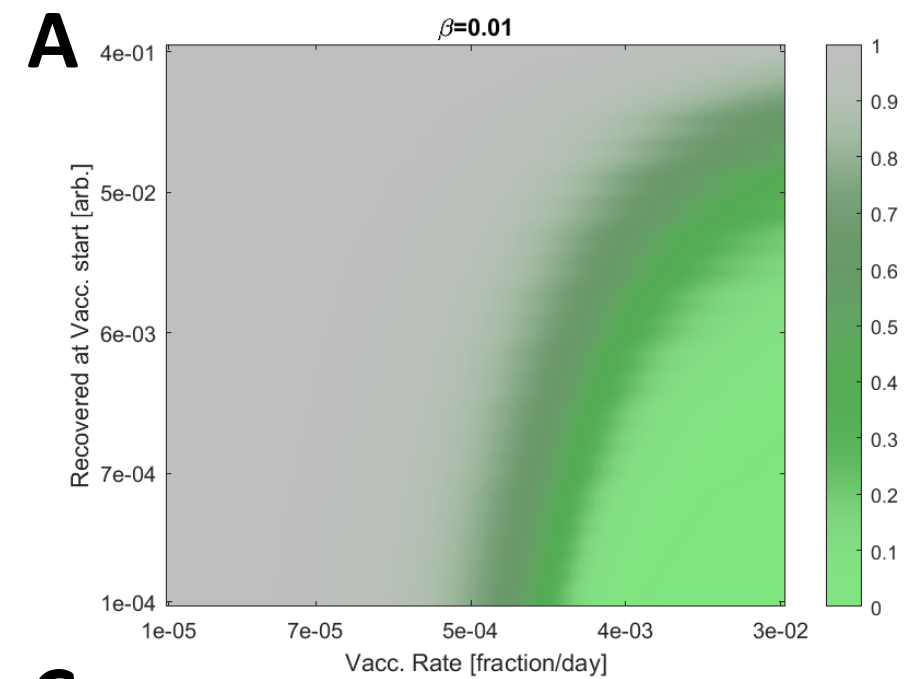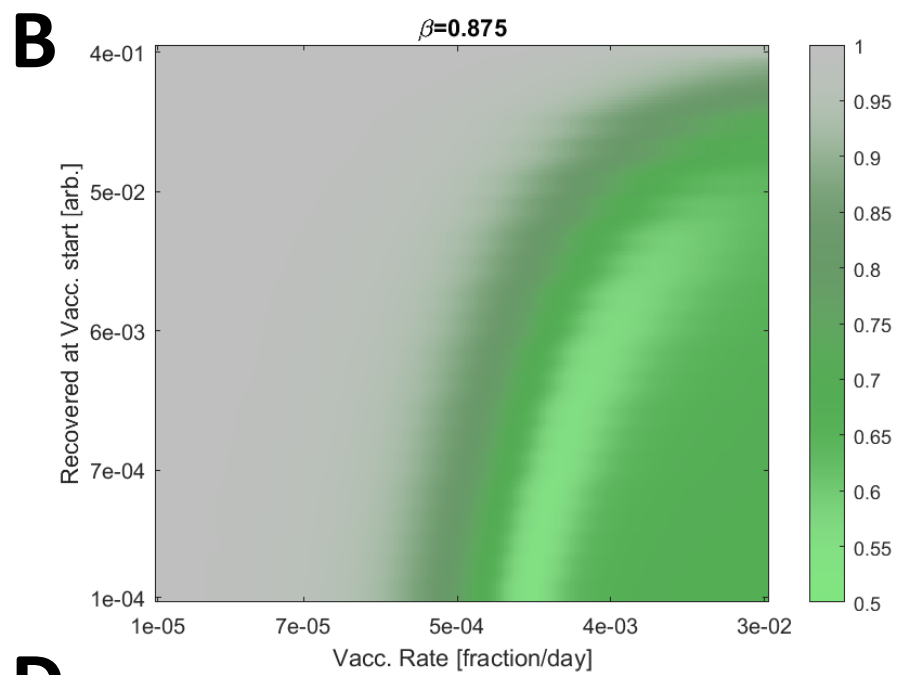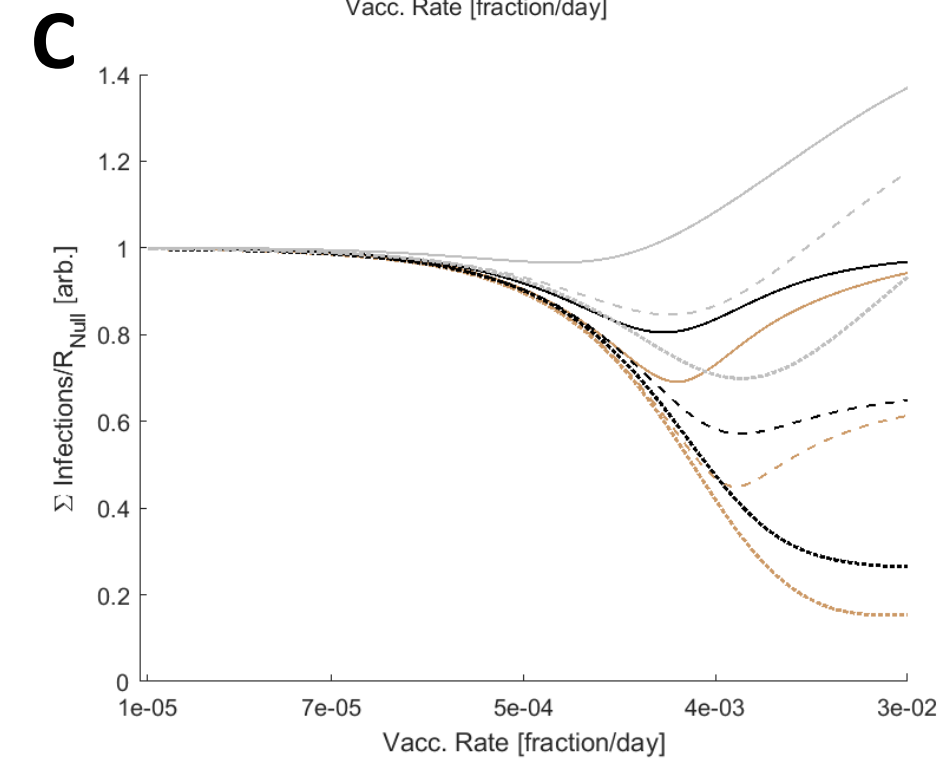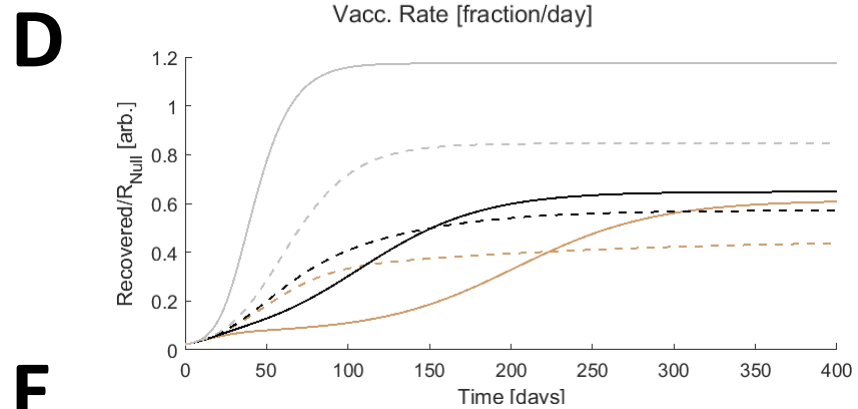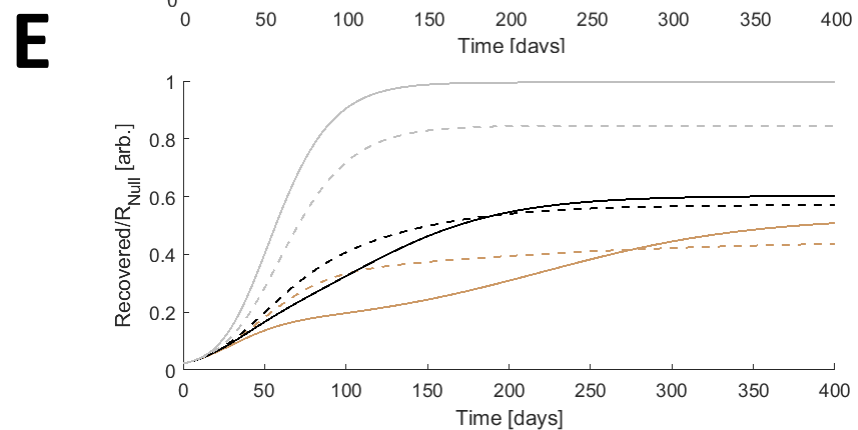

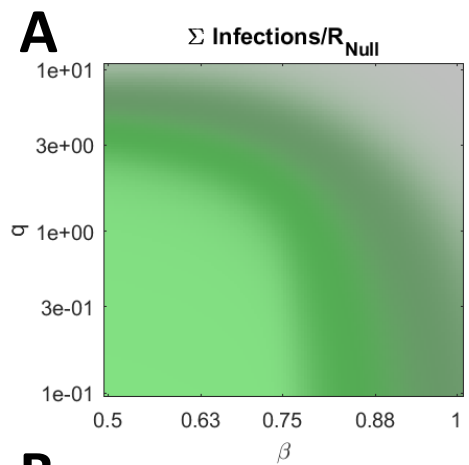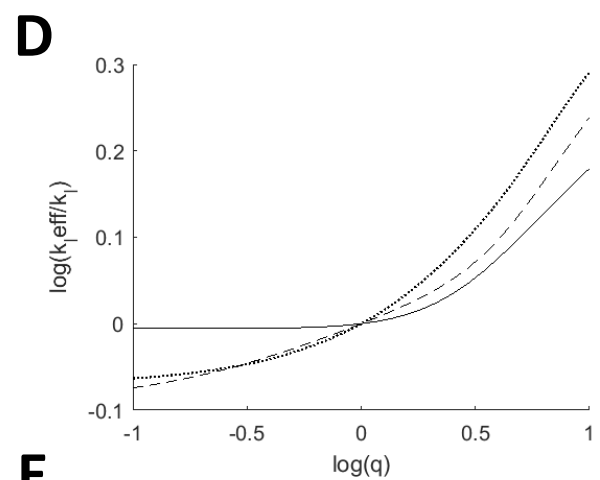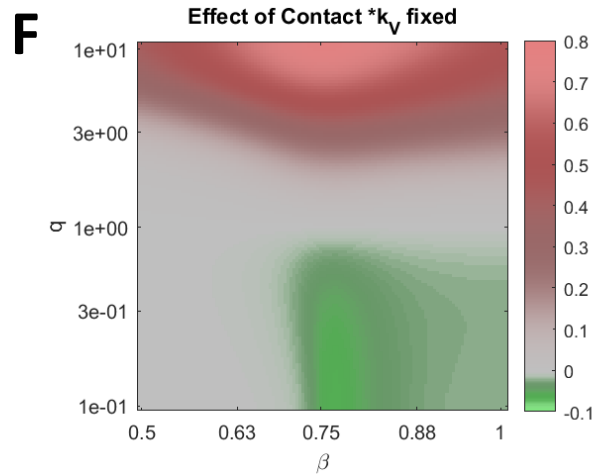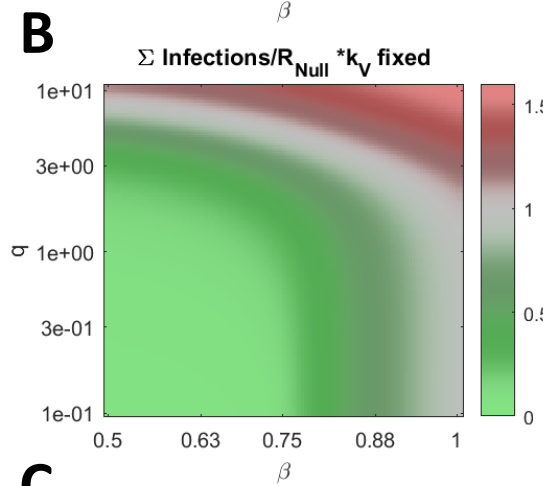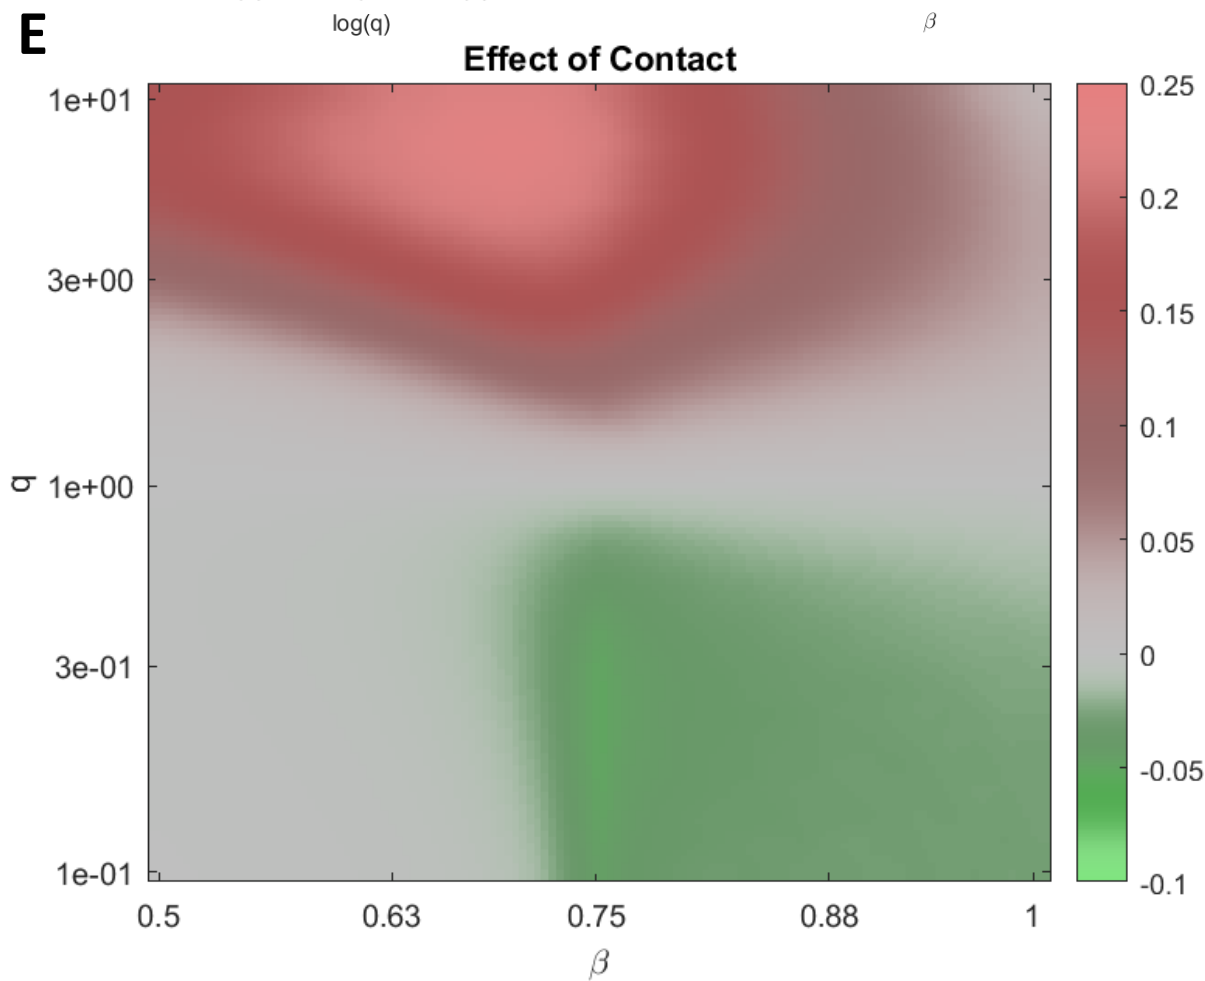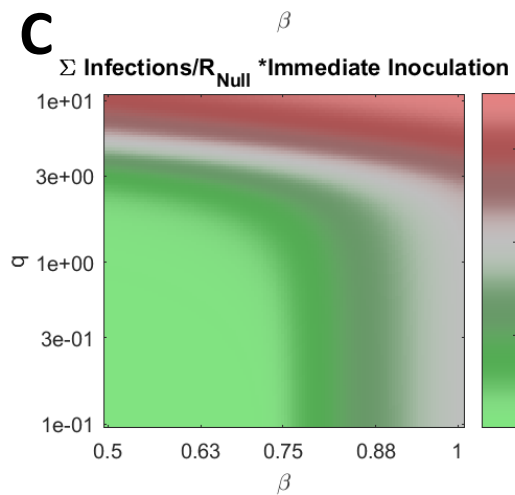

Source: https://medrxiv.org/content/10.1101/2020.12.19.20248554v1.full.pdf
